# Supplementary material for: Whole-Transcriptome Analysis Identifies Gender Dimorphic Expressions of Mrnas and Non-Coding Rnas in Chinese Soft-Shell Turtle (Pelodiscus sinensis)
Source: MDPI journal article supplement (doi:10.3390/biology11060834), 2022-05-29
Supplement: s1 [file s1]

Junxian Zhu,

a doctoral student at Shanghai Ocean University, focuses on sex determination and sex differentiation in *Pelodiscus sinensis*.

Luo Lei,

a doctoral student at Nanjing Agricultural University, focuses on sex determination and sex differentiation in *Pelodiscus sinensis*.

Chen Chen,

a staff with a PhD, works at the Pearl River Fisheries Research Institute, Chinese Academy of Fishery Sciences, focusing on the genetic breeding of *Pelodiscus sinensis*.

Yakun Wang,

a staff with a PhD, works at the Pearl River Fisheries Research Institute, Chinese Academy of Fishery Sciences, focusing on the reproduction and breeding of *Mauremys mutica* and *Macrobrachium rosenbergii*.

Xiaoli Liu,

a staff with a PhD, works at the Pearl River Fisheries Research Institute, Chinese Academy of Fishery Sciences, focusing on the reproduction and breeding of *Mauremys mutica*.

Lulu Geng,

a master's student at Nanjing Agricultural University, focuses on sex determination and sex differentiation in *Pelodiscus sinensis*.

Ruiyang Li,

a staff, works at the Pearl River Fisheries Research Institute, Chinese Academy of Fishery Sciences, focusing on the genetic breeding of *Pelodiscus sinensis* and *Mauremys mutica*.

Haigang Chen,

a staff, works at the Pearl River Fisheries Research Institute, Chinese Academy of Fishery Sciences, focusing on the genetic breeding of *Pelodiscus sinensis* and *Mauremys mutica*.

Xiaoyou Hong,

a staff with a PhD, works at the Pearl River Fisheries Research Institute, Chinese Academy of Fishery Sciences, focusing on conservation of genetic resources in *Pelochelys cantorii*.

Lingyun Yu,

an associate professor, works at the Pearl River Fisheries Research Institute, Chinese Academy of Fishery Sciences, focusing on the reproduction and breeding of *Macrobrachium rosenbergii*.

Chengqing Wei,

a staff, works at the Pearl River Fisheries Research Institute, Chinese Academy of Fishery Sciences, focusing on the genetic breeding of *Pelodiscus sinensis* and *Mauremys mutica*.

Wei Li,

an associate professor, works at the Pearl River Fisheries Research Institute, Chinese Academy of Fishery Sciences, focusing on sex determination and sex differentiation in *Pelodiscus sinensis*.

Xinping Zhu,

a professor, works at the Pearl River Fisheries Research Institute, Chinese Academy of Fishery Sciences, focusing on the reproductive, breeding, and conservation biology of *Pelodiscus sinensis*, *Mauremys mutica*, *Macrobrachium rosenbergii* and *Pelochelys cantorii*.
